# Supplementary material for: In-Silico Tool for Predicting, Scanning, and Designing Defensins
Source: Front Immunol. 2021 Nov 22;12:780610. doi: 10.3389/fimmu.2021.780610 (PMC8645896; doi:10.3389/fimmu.2021.780610)
Supplement: Supplementary file 5 [file Table_5.xlsx]

## Sheet: Table 1 (Total ranked features)
feature	importance	normalized_importance	cumulative_importance
QSO1_SC_C	114.3	0.0581798	0.0581798
BTC_H	65.3	0.0332383	0.0914181
CeTD_SS1	54.7	0.0278428	0.119261
SEP_PO	51	0.0259595	0.14522
AAC_C	50.3	0.0256032	0.170824
DDR_C	46.9	0.0238725	0.194696
SEP_SS_CO	39.6	0.0201568	0.214853
SEP_SM	35.5	0.0180698	0.232923
AAC_L	32.8	0.0166955	0.249618
BTC_D	26.5	0.0134888	0.263107
DPC1_PQ	26.4	0.0134378	0.276545
CeTD_VW2	25.9	0.0131833	0.289728
QSO1_SC_L	25.4	0.0129288	0.302657
AAC_N	24.1	0.0122671	0.314924
DPC1_DD	23.4	0.0119108	0.326835
SOC1_G1	22.5	0.0114527	0.338288
BTC_T	22.3	0.0113509	0.349639
DDR_L	21.8	0.0110964	0.360735
QSO1_SC1	21.7	0.0110455	0.371781
SEP_SS_HE	21.2	0.010791	0.382572
DPC1_KK	20.5	0.0104347	0.393006
ATC_H	18.2	0.00926397	0.40227
CeTD_PZ2	17.7	0.00900947	0.41128
DPC1_QV	17.6	0.00895857	0.420238
SER_L	16.3	0.00829685	0.428535
TPC_KSC	16.2	0.00824595	0.436781
SEP	14.4	0.00732974	0.444111
SER_C	14.4	0.00732974	0.45144
ATC_N	14.1	0.00717703	0.458618
QSO1_SC_N	13.9	0.00707523	0.465693
SEP_TN	13	0.00661712	0.47231
BTC_S	12.9	0.00656622	0.478876
SEP_NE	12.5	0.00636262	0.485239
CeTD_VW1	12.4	0.00631172	0.49155
CTC_614	12.3	0.00626082	0.497811
CeTD_PZ1	12.3	0.00626082	0.504072
SEP_HL	11.9	0.00605721	0.510129
DDR_G	11.8	0.00600631	0.516136
DPC1_FL	11.7	0.00595541	0.522091
ATC_S	11.3	0.00575181	0.527843
CeTD_PO1	10.5	0.0053446	0.533187
APAAC1_SC_lam1	10.3	0.0052428	0.53843
QSO1_SC_Y	10.2	0.0051919	0.543622
APAAC1_HL_lam1	10.1	0.005141	0.548763
DDR_H	10.1	0.005141	0.553904
DDR_R	10	0.00509009	0.558994
CeTD_CH1	9.8	0.00498829	0.563982
APAAC1_HB_lam1	9.4	0.00478469	0.568767
DDR_E	9.2	0.00468289	0.57345
AAC_Y	9.2	0.00468289	0.578133
SEP_AL	9	0.00458109	0.582714
CTC_537	8.9	0.00453018	0.587244
DPC1_DF	8.8	0.00447928	0.591724
DPC1_SQ	8.8	0.00447928	0.596203
CeTD_CH2	8.7	0.00442838	0.600631
CeTD_HB2	8.7	0.00442838	0.60506
DDR_S	8.7	0.00442838	0.609488
DDR_Q	8.6	0.00437748	0.613865
QSO1_SC_G	8.5	0.00432658	0.618192
SEP_PC	8.4	0.00427568	0.622468
SEP_SC	8.2	0.00417388	0.626642
AAC_G	7.8	0.00397027	0.630612
DPC1_YD	7.8	0.00397027	0.634582
DPC1_PG	7.5	0.00381757	0.6384
SEP_SA_IN	7.5	0.00381757	0.642217
DDR_I	7.3	0.00371577	0.645933
QSO1_SC_E	7.2	0.00366487	0.649598
CTC_331	7.1	0.00361397	0.653212
CTC_464	7.1	0.00361397	0.656826
SEP_HB	7.1	0.00361397	0.66044
PAAC1_lam1	7	0.00356307	0.664003
SER_N	7	0.00356307	0.667566
CTC_436	6.9	0.00351217	0.671078
CTC_235	6.8	0.00346126	0.674539
SEP_NP	6.7	0.00341036	0.67795
DPC1_MK	6.6	0.00335946	0.681309
DPC1_GG	6.6	0.00335946	0.684669
DPC1_ES	6.5	0.00330856	0.687977
DPC1_SS	6.5	0.00330856	0.691286
AAC_S	6.5	0.00330856	0.694594
DDR_N	6.5	0.00330856	0.697903
SOC1_SC1	6.5	0.00330856	0.701211
AAC_Q	6.4	0.00325766	0.704469
AAC_A	6.3	0.00320676	0.707676
DDR_V	6.3	0.00320676	0.710883
DPC1_GD	6.1	0.00310496	0.713988
SEP_NC	6	0.00305406	0.717042
CeTD_SS3	6	0.00305406	0.720096
SEP_SA_BU	6	0.00305406	0.72315
DDR_P	5.9	0.00300316	0.726153
DDR_K	5.9	0.00300316	0.729156
SEP_AR	5.8	0.00295225	0.732108
CTC_364	5.7	0.00290135	0.73501
DPC1_AF	5.7	0.00290135	0.737911
CeTD_HB3	5.6	0.00285045	0.740761
SEP_SS_ST	5.6	0.00285045	0.743612
QSO1_SC_Q	5.5	0.00279955	0.746411
DPC1_GP	5.4	0.00274865	0.74916
SEP_HX	5.2	0.00264685	0.751807
DPC1_SC	5	0.00254505	0.754352
QSO1_SC_S	4.9	0.00249415	0.756846
CeTD_PO3	4.8	0.00244325	0.759289
DDR_D	4.8	0.00244325	0.761733
AAC_R	4.8	0.00244325	0.764176
CeTD_SA1	4.7	0.00239234	0.766568
TPC_LLS	4.7	0.00239234	0.768961
DPC1_AY	4.7	0.00239234	0.771353
ATC_C	4.6	0.00234144	0.773694
DDR_A	4.5	0.00229054	0.775985
ATC_O	4.5	0.00229054	0.778275
SEP_NT	4.5	0.00229054	0.780566
DDR_Y	4.5	0.00229054	0.782857
AAC_E	4.4	0.00223964	0.785096
DPC1_PS	4.4	0.00223964	0.787336
DPC1_ND	4.4	0.00223964	0.789575
QSO1_SC_K	4.2	0.00213784	0.791713
AAC_D	4.2	0.00213784	0.793851
QSO1_SC_W	4.2	0.00213784	0.795989
QSO1_SC_T	4.1	0.00208694	0.798076
QSO1_SC_I	4	0.00203604	0.800112
CeTD_VW3	3.8	0.00193424	0.802046
DPC1_YA	3.8	0.00193424	0.80398
DPC1_MT	3.8	0.00193424	0.805915
QSO1_SC_F	3.7	0.00188334	0.807798
DPC1_SM	3.6	0.00183243	0.80963
DDR_T	3.6	0.00183243	0.811463
QSO1_SC_V	3.6	0.00183243	0.813295
DPC1_CR	3.5	0.00178153	0.815077
DDR_W	3.5	0.00178153	0.816858
DPC1_RC	3.5	0.00178153	0.81864
QSO1_SC_R	3.5	0.00178153	0.820421
AAC_K	3.4	0.00173063	0.822152
DPC1_RL	3.3	0.00167973	0.823832
CeTD_PZ3	3.3	0.00167973	0.825512
CeTD_HB1	3.3	0.00167973	0.827191
SEP_SA_EX	3.3	0.00167973	0.828871
AAC_V	3.3	0.00167973	0.830551
QSO1_SC_A	3.2	0.00162883	0.83218
DPC1_AD	3.2	0.00162883	0.833808
DPC1_RT	3.2	0.00162883	0.835437
TPC_CRC	3.2	0.00162883	0.837066
DPC1_KE	3.2	0.00162883	0.838695
QSO1_SC_D	3.1	0.00157793	0.840273
DPC1_KR	3	0.00152703	0.8418
DPC1_GL	3	0.00152703	0.843327
AAC_H	3	0.00152703	0.844854
AAC_T	3	0.00152703	0.846381
CeTD_PO2	2.9	0.00147613	0.847857
DPC1_HE	2.9	0.00147613	0.849333
AAC_P	2.9	0.00147613	0.850809
AAC_I	2.9	0.00147613	0.852285
SER_G	2.9	0.00147613	0.853762
CTC_434	2.8	0.00142523	0.855187
DPC1_TF	2.7	0.00137433	0.856561
QSO1_SC_P	2.7	0.00137433	0.857935
DPC1_SL	2.6	0.00132342	0.859259
QSO1_G_S	2.6	0.00132342	0.860582
DPC1_GR	2.6	0.00132342	0.861906
DPC1_SR	2.5	0.00127252	0.863178
DPC1_LV	2.5	0.00127252	0.864451
DDR_M	2.4	0.00122162	0.865672
SER_R	2.4	0.00122162	0.866894
RRI_G	2.4	0.00122162	0.868116
CTC_233	2.3	0.00117072	0.869286
DPC1_LL	2.3	0.00117072	0.870457
DPC1_KH	2.2	0.00111982	0.871577
SER_Q	2.2	0.00111982	0.872697
QSO1_G_C	2.2	0.00111982	0.873817
DPC1_GQ	2.2	0.00111982	0.874936
DPC1_DP	2.2	0.00111982	0.876056
AAC_F	2.2	0.00111982	0.877176
DDR_F	2	0.00101802	0.878194
CTC_122	2	0.00101802	0.879212
DPC1_RG	2	0.00101802	0.88023
AAC_M	2	0.00101802	0.881248
CTC_123	1.9	0.000967118	0.882215
QSO1_G_L	1.9	0.000967118	0.883182
DPC1_KT	1.9	0.000967118	0.884149
SER_Y	1.9	0.000967118	0.885117
TPC_SCC	1.9	0.000967118	0.886084
SER_S	1.8	0.000916217	0.887
DPC1_DE	1.8	0.000916217	0.887916
DPC1_EK	1.8	0.000916217	0.888832
DPC1_SG	1.7	0.000865316	0.889698
DPC1_DL	1.7	0.000865316	0.890563
CTC_521	1.7	0.000865316	0.891428
QSO1_SC_H	1.6	0.000814415	0.892243
DPC1_WA	1.6	0.000814415	0.893057
DPC1_TR	1.6	0.000814415	0.893872
CTC_224	1.6	0.000814415	0.894686
CTC_171	1.6	0.000814415	0.8955
DPC1_LY	1.6	0.000814415	0.896315
DPC1_LF	1.6	0.000814415	0.897129
CTC_312	1.6	0.000814415	0.897944
DPC1_FT	1.6	0.000814415	0.898758
TPC_GLD	1.6	0.000814415	0.899572
DPC1_DN	1.5	0.000763514	0.900336
CTC_314	1.5	0.000763514	0.901099
CTC_533	1.5	0.000763514	0.901863
DPC1_LS	1.5	0.000763514	0.902626
DPC1_LD	1.5	0.000763514	0.90339
DPC1_KL	1.5	0.000763514	0.904154
DPC1_KC	1.5	0.000763514	0.904917
DPC1_CL	1.5	0.000763514	0.905681
CTC_121	1.5	0.000763514	0.906444
DPC1_GV	1.4	0.000712613	0.907157
CTC_553	1.4	0.000712613	0.907869
DPC1_AS	1.4	0.000712613	0.908582
QSO1_G_N	1.4	0.000712613	0.909295
CTC_232	1.4	0.000712613	0.910007
DPC1_EG	1.4	0.000712613	0.91072
CTC_641	1.4	0.000712613	0.911432
QSO1_SC_M	1.4	0.000712613	0.912145
CTC_166	1.4	0.000712613	0.912858
DPC1_IQ	1.4	0.000712613	0.91357
DPC1_AG	1.3	0.000661712	0.914232
DPC1_MG	1.3	0.000661712	0.914894
DPC1_VK	1.3	0.000661712	0.915555
TPC_ARL	1.3	0.000661712	0.916217
RRI_C	1.3	0.000661712	0.916879
DPC1_LI	1.3	0.000661712	0.91754
DPC1_LR	1.3	0.000661712	0.918202
CTC_525	1.3	0.000661712	0.918864
DPC1_HG	1.3	0.000661712	0.919526
CTC_412	1.2	0.000610811	0.920136
DPC1_SA	1.2	0.000610811	0.920747
CTC_127	1.2	0.000610811	0.921358
DPC1_CC	1.2	0.000610811	0.921969
DPC1_PE	1.2	0.000610811	0.92258
SER_F	1.2	0.000610811	0.92319
SER_T	1.2	0.000610811	0.923801
DPC1_IM	1.2	0.000610811	0.924412
DPC1_TK	1.1	0.00055991	0.924972
DPC1_AK	1.1	0.00055991	0.925532
DPC1_LE	1.1	0.00055991	0.926092
DPC1_AN	1.1	0.00055991	0.926652
DPC1_TA	1.1	0.00055991	0.927212
DPC1_KS	1.1	0.00055991	0.927772
RRI_D	1.1	0.00055991	0.928331
DPC1_PH	1.1	0.00055991	0.928891
DPC1_CW	1.1	0.00055991	0.929451
DPC1_TV	1.1	0.00055991	0.930011
CTC_262	1.1	0.00055991	0.930571
SER_E	1.1	0.00055991	0.931131
CTC_112	1.1	0.00055991	0.931691
DPC1_YK	1.1	0.00055991	0.932251
CTC_336	1	0.000509009	0.93276
DPC1_NG	1	0.000509009	0.933269
DPC1_TN	1	0.000509009	0.933778
DPC1_SD	1	0.000509009	0.934287
AAC_W	1	0.000509009	0.934796
DPC1_CE	1	0.000509009	0.935305
CTC_113	1	0.000509009	0.935814
DPC1_LK	1	0.000509009	0.936323
DPC1_VM	1	0.000509009	0.936832
DPC1_AR	1	0.000509009	0.937341
DPC1_ST	1	0.000509009	0.93785
SER_K	1	0.000509009	0.938359
DPC1_EL	1	0.000509009	0.938868
SER_D	1	0.000509009	0.939377
DPC1_GK	1	0.000509009	0.939886
CTC_321	0.9	0.000458109	0.940344
DPC1_IG	0.9	0.000458109	0.940802
DPC1_WK	0.9	0.000458109	0.94126
CTC_141	0.9	0.000458109	0.941718
TPC_VCT	0.9	0.000458109	0.942177
CTC_266	0.9	0.000458109	0.942635
DPC1_TP	0.9	0.000458109	0.943093
SER_A	0.9	0.000458109	0.943551
DPC1_YG	0.9	0.000458109	0.944009
DPC1_CD	0.8	0.000407208	0.944416
CTC_152	0.8	0.000407208	0.944823
CTC_125	0.8	0.000407208	0.945231
DPC1_RP	0.8	0.000407208	0.945638
DPC1_CK	0.8	0.000407208	0.946045
SER_V	0.8	0.000407208	0.946452
DPC1_TD	0.8	0.000407208	0.946859
DPC1_WS	0.8	0.000407208	0.947267
TPC_KAL	0.8	0.000407208	0.947674
CTC_642	0.8	0.000407208	0.948081
DPC1_RK	0.8	0.000407208	0.948488
DPC1_GI	0.8	0.000407208	0.948895
DPC1_QG	0.7	0.000356307	0.949252
DPC1_CP	0.7	0.000356307	0.949608
DPC1_RA	0.7	0.000356307	0.949964
DPC1_IF	0.7	0.000356307	0.950321
DPC1_GC	0.7	0.000356307	0.950677
DPC1_SY	0.7	0.000356307	0.951033
CTC_342	0.7	0.000356307	0.95139
DPC1_HR	0.7	0.000356307	0.951746
TPC_GAC	0.7	0.000356307	0.952102
DPC1_NE	0.7	0.000356307	0.952459
DPC1_AI	0.7	0.000356307	0.952815
RRI_Y	0.7	0.000356307	0.953171
DPC1_FS	0.6	0.000305406	0.953477
TPC_CCC	0.6	0.000305406	0.953782
TPC_RTC	0.6	0.000305406	0.954087
DPC1_GF	0.6	0.000305406	0.954393
DPC1_QR	0.6	0.000305406	0.954698
DPC1_KP	0.6	0.000305406	0.955004
DPC1_QE	0.6	0.000305406	0.955309
CTC_226	0.6	0.000305406	0.955614
DPC1_NS	0.6	0.000305406	0.95592
CTC_572	0.6	0.000305406	0.956225
CTC_446	0.6	0.000305406	0.956531
DPC1_QS	0.6	0.000305406	0.956836
DPC1_DV	0.6	0.000305406	0.957141
CTC_222	0.6	0.000305406	0.957447
CTC_326	0.6	0.000305406	0.957752
DPC1_QL	0.6	0.000305406	0.958058
DPC1_NA	0.6	0.000305406	0.958363
CTC_155	0.5	0.000254505	0.958618
CTC_343	0.5	0.000254505	0.958872
CTC_311	0.5	0.000254505	0.959127
DPC1_LA	0.5	0.000254505	0.959381
DPC1_GS	0.5	0.000254505	0.959636
SER_H	0.5	0.000254505	0.95989
DPC1_GT	0.5	0.000254505	0.960145
CTC_332	0.5	0.000254505	0.960399
DPC1_VI	0.5	0.000254505	0.960654
DPC1_LQ	0.5	0.000254505	0.960908
DPC1_SP	0.5	0.000254505	0.961163
DPC1_FG	0.5	0.000254505	0.961417
DPC1_VH	0.5	0.000254505	0.961672
DPC1_DA	0.5	0.000254505	0.961926
CTC_511	0.5	0.000254505	0.962181
DPC1_MQ	0.5	0.000254505	0.962435
DPC1_TS	0.5	0.000254505	0.96269
CTC_422	0.5	0.000254505	0.962944
TPC_TRN	0.5	0.000254505	0.963199
QSO1_G_T	0.5	0.000254505	0.963453
QSO1_G_Y	0.5	0.000254505	0.963708
DPC1_WT	0.5	0.000254505	0.963962
DPC1_KQ	0.5	0.000254505	0.964217
DPC1_AA	0.5	0.000254505	0.964471
DPC1_DR	0.5	0.000254505	0.964726
DPC1_AE	0.5	0.000254505	0.96498
CTC_633	0.5	0.000254505	0.965235
DPC1_KG	0.5	0.000254505	0.965489
DPC1_KI	0.5	0.000254505	0.965744
DPC1_IL	0.5	0.000254505	0.965998
DPC1_QK	0.5	0.000254505	0.966253
DPC1_KD	0.5	0.000254505	0.966507
DPC1_ID	0.5	0.000254505	0.966762
CTC_223	0.5	0.000254505	0.967016
CTC_661	0.5	0.000254505	0.967271
DPC1_PT	0.5	0.000254505	0.967525
CTC_552	0.5	0.000254505	0.96778
CTC_744	0.5	0.000254505	0.968034
DPC1_EH	0.5	0.000254505	0.968289
DPC1_HN	0.5	0.000254505	0.968543
TPC_ACK	0.5	0.000254505	0.968798
TPC_CLR	0.5	0.000254505	0.969052
DPC1_VL	0.4	0.000203604	0.969256
DPC1_YL	0.4	0.000203604	0.969459
RRI_A	0.4	0.000203604	0.969663
DPC1_VG	0.4	0.000203604	0.969867
SER_I	0.4	0.000203604	0.97007
DPC1_AT	0.4	0.000203604	0.970274
DPC1_VP	0.4	0.000203604	0.970477
DPC1_VF	0.4	0.000203604	0.970681
CTC_451	0.4	0.000203604	0.970885
CTC_341	0.4	0.000203604	0.971088
CTC_241	0.4	0.000203604	0.971292
CTC_635	0.4	0.000203604	0.971495
CTC_153	0.4	0.000203604	0.971699
TPC_DNL	0.4	0.000203604	0.971903
DPC1_IN	0.4	0.000203604	0.972106
CTC_216	0.4	0.000203604	0.97231
CTC_515	0.4	0.000203604	0.972513
CTC_245	0.4	0.000203604	0.972717
DPC1_RS	0.4	0.000203604	0.972921
CTC_246	0.4	0.000203604	0.973124
CTC_512	0.4	0.000203604	0.973328
CTC_465	0.4	0.000203604	0.973532
CTC_442	0.4	0.000203604	0.973735
DPC1_VA	0.4	0.000203604	0.973939
CTC_353	0.4	0.000203604	0.974142
DPC1_RM	0.4	0.000203604	0.974346
CTC_211	0.4	0.000203604	0.97455
TPC_TCP	0.4	0.000203604	0.974753
DPC1_IA	0.4	0.000203604	0.974957
CTC_654	0.4	0.000203604	0.97516
DPC1_HV	0.4	0.000203604	0.975364
DPC1_TQ	0.4	0.000203604	0.975568
DPC1_SH	0.4	0.000203604	0.975771
DPC1_FY	0.4	0.000203604	0.975975
DPC1_FE	0.4	0.000203604	0.976178
DPC1_ER	0.4	0.000203604	0.976382
DPC1_FC	0.4	0.000203604	0.976586
RRI_E	0.3	0.000152703	0.976738
CTC_411	0.3	0.000152703	0.976891
QSO1_G_I	0.3	0.000152703	0.977044
CTC_423	0.3	0.000152703	0.977196
DPC1_ML	0.3	0.000152703	0.977349
DPC1_FR	0.3	0.000152703	0.977502
DPC1_LN	0.3	0.000152703	0.977654
QSO1_G_P	0.3	0.000152703	0.977807
DPC1_IE	0.3	0.000152703	0.97796
CTC_536	0.3	0.000152703	0.978113
DPC1_KV	0.3	0.000152703	0.978265
CTC_611	0.3	0.000152703	0.978418
DPC1_KA	0.3	0.000152703	0.978571
DPC1_IT	0.3	0.000152703	0.978723
CTC_634	0.3	0.000152703	0.978876
DPC1_IC	0.3	0.000152703	0.979029
CTC_371	0.3	0.000152703	0.979182
DPC1_VD	0.3	0.000152703	0.979334
CTC_363	0.3	0.000152703	0.979487
DPC1_YH	0.3	0.000152703	0.97964
DPC1_TY	0.3	0.000152703	0.979792
DPC1_DG	0.3	0.000152703	0.979945
DPC1_TG	0.3	0.000152703	0.980098
DPC1_TC	0.3	0.000152703	0.98025
DPC1_CT	0.3	0.000152703	0.980403
DPC1_DK	0.3	0.000152703	0.980556
DPC1_VR	0.3	0.000152703	0.980709
DPC1_VS	0.3	0.000152703	0.980861
CTC_111	0.3	0.000152703	0.981014
CTC_116	0.3	0.000152703	0.981167
SER_W	0.3	0.000152703	0.981319
DPC1_QP	0.3	0.000152703	0.981472
CTC_212	0.3	0.000152703	0.981625
CTC_215	0.3	0.000152703	0.981777
QSO1_G_A	0.3	0.000152703	0.98193
CTC_234	0.3	0.000152703	0.982083
CTC_362	0.3	0.000152703	0.982236
CTC_335	0.3	0.000152703	0.982388
CTC_333	0.3	0.000152703	0.982541
CTC_322	0.3	0.000152703	0.982694
CTC_315	0.3	0.000152703	0.982846
DPC1_PA	0.3	0.000152703	0.982999
DPC1_PV	0.3	0.000152703	0.983152
CTC_231	0.3	0.000152703	0.983304
SER_M	0.3	0.000152703	0.983457
DPC1_QC	0.3	0.000152703	0.98361
SER_P	0.3	0.000152703	0.983763
TPC_NGG	0.3	0.000152703	0.983915
CTC_631	0.3	0.000152703	0.984068
CTC_132	0.3	0.000152703	0.984221
TPC_CCS	0.3	0.000152703	0.984373
CTC_632	0.3	0.000152703	0.984526
CTC_416	0.3	0.000152703	0.984679
TPC_TCR	0.3	0.000152703	0.984832
CTC_623	0.3	0.000152703	0.984984
CeTD_SA3	0.3	0.000152703	0.985137
DPC1_EV	0.3	0.000152703	0.98529
RRI_T	0.3	0.000152703	0.985442
DPC1_GW	0.3	0.000152703	0.985595
DPC1_GH	0.3	0.000152703	0.985748
DPC1_KY	0.3	0.000152703	0.9859
DPC1_IP	0.3	0.000152703	0.986053
DPC1_RD	0.3	0.000152703	0.986206
DPC1_NM	0.2	0.000101802	0.986308
CTC_271	0.2	0.000101802	0.986409
TPC_LVA	0.2	0.000101802	0.986511
DPC1_EN	0.2	0.000101802	0.986613
TPC_CNY	0.2	0.000101802	0.986715
CTC_344	0.2	0.000101802	0.986817
DPC1_NL	0.2	0.000101802	0.986918
DPC1_PN	0.2	0.000101802	0.98702
CTC_351	0.2	0.000101802	0.987122
CTC_352	0.2	0.000101802	0.987224
CTC_361	0.2	0.000101802	0.987326
CTC_365	0.2	0.000101802	0.987427
DPC1_PF	0.2	0.000101802	0.987529
RRI_V	0.2	0.000101802	0.987631
DPC1_PW	0.2	0.000101802	0.987733
CTC_421	0.2	0.000101802	0.987835
DPC1_QA	0.2	0.000101802	0.987936
CTC_225	0.2	0.000101802	0.988038
CTC_221	0.2	0.000101802	0.98814
DPC1_QI	0.2	0.000101802	0.988242
CTC_213	0.2	0.000101802	0.988344
TPC_NCN	0.2	0.000101802	0.988445
CTC_143	0.2	0.000101802	0.988547
CTC_136	0.2	0.000101802	0.988649
DPC1_RI	0.2	0.000101802	0.988751
DPC1_RN	0.2	0.000101802	0.988853
DPC1_RQ	0.2	0.000101802	0.988954
CTC_115	0.2	0.000101802	0.989056
TPC_KAK	0.2	0.000101802	0.989158
DPC1_ME	0.2	0.000101802	0.98926
CTC_426	0.2	0.000101802	0.989362
CTC_431	0.2	0.000101802	0.989464
TPC_CER	0.2	0.000101802	0.989565
DPC1_HC	0.2	0.000101802	0.989667
DPC1_FQ	0.2	0.000101802	0.989769
DPC1_ED	0.2	0.000101802	0.989871
DPC1_FK	0.2	0.000101802	0.989973
QSO1_G_D	0.2	0.000101802	0.990074
QSO1_G_E	0.2	0.000101802	0.990176
DPC1_EC	0.2	0.000101802	0.990278
QSO1_G_Q	0.2	0.000101802	0.99038
DPC1_FA	0.2	0.000101802	0.990482
DPC1_EY	0.2	0.000101802	0.990583
QSO1_G_V	0.2	0.000101802	0.990685
CTC_721	0.2	0.000101802	0.990787
DPC1_EQ	0.2	0.000101802	0.990889
CTC_666	0.2	0.000101802	0.990991
CTC_662	0.2	0.000101802	0.991092
CTC_655	0.2	0.000101802	0.991194
TPC_GGS	0.2	0.000101802	0.991296
DPC1_IH	0.2	0.000101802	0.991398
CTC_624	0.2	0.000101802	0.9915
DPC1_KF	0.2	0.000101802	0.991601
TPC_KRL	0.2	0.000101802	0.991703
CTC_566	0.2	0.000101802	0.991805
CTC_542	0.2	0.000101802	0.991907
CTC_466	0.2	0.000101802	0.992009
DPC1_SF	0.2	0.000101802	0.99211
CTC_443	0.2	0.000101802	0.992212
CTC_114	0.2	0.000101802	0.992314
DPC1_MR	0.2	0.000101802	0.992416
DPC1_YV	0.2	0.000101802	0.992518
TPC_RRR	0.2	0.000101802	0.992619
DPC1_YS	0.2	0.000101802	0.992721
DPC1_AQ	0.2	0.000101802	0.992823
DPC1_TL	0.2	0.000101802	0.992925
DPC1_AP	0.2	0.000101802	0.993027
DPC1_DC	0.2	0.000101802	0.993128
DPC1_VC	0.2	0.000101802	0.99323
DPC1_VE	0.2	0.000101802	0.993332
DPC1_VW	0.2	0.000101802	0.993434
DPC1_CH	0.2	0.000101802	0.993536
DPC1_AH	0.2	0.000101802	0.993637
DPC1_CG	0.2	0.000101802	0.993739
DPC1_AL	0.1	5.09009e-05	0.99379
DPC1_PI	0.1	5.09009e-05	0.993841
DPC1_MC	0.1	5.09009e-05	0.993892
DPC1_YT	0.1	5.09009e-05	0.993943
DPC1_NP	0.1	5.09009e-05	0.993994
CTC_551	0.1	5.09009e-05	0.994045
DPC1_NR	0.1	5.09009e-05	0.994095
CTC_325	0.1	5.09009e-05	0.994146
DPC1_FN	0.1	5.09009e-05	0.994197
RRI_L	0.1	5.09009e-05	0.994248
DPC1_VV	0.1	5.09009e-05	0.994299
CTC_746	0.1	5.09009e-05	0.99435
QSO1_G_R	0.1	5.09009e-05	0.994401
DPC1_VQ	0.1	5.09009e-05	0.994452
CTC_316	0.1	5.09009e-05	0.994503
DPC1_YC	0.1	5.09009e-05	0.994554
DPC1_NY	0.1	5.09009e-05	0.994604
DPC1_EP	0.1	5.09009e-05	0.994655
DPC1_FD	0.1	5.09009e-05	0.994706
DPC1_VY	0.1	5.09009e-05	0.994757
CTC_615	0.1	5.09009e-05	0.994808
DPC1_IY	0.1	5.09009e-05	0.994859
CTC_613	0.1	5.09009e-05	0.99491
DPC1_FI	0.1	5.09009e-05	0.994961
DPC1_VN	0.1	5.09009e-05	0.995012
QSO1_G_G	0.1	5.09009e-05	0.995063
RRI_K	0.1	5.09009e-05	0.995114
DPC1_PD	0.1	5.09009e-05	0.995164
DPC1_NI	0.1	5.09009e-05	0.995215
CTC_716	0.1	5.09009e-05	0.995266
DPC1_YQ	0.1	5.09009e-05	0.995317
DPC1_CS	0.1	5.09009e-05	0.995368
CTC_663	0.1	5.09009e-05	0.995419
DPC1_AV	0.1	5.09009e-05	0.99547
CTC_377	0.1	5.09009e-05	0.995521
DPC1_IS	0.1	5.09009e-05	0.995572
DPC1_IR	0.1	5.09009e-05	0.995623
CTC_413	0.1	5.09009e-05	0.995673
CTC_656	0.1	5.09009e-05	0.995724
CTC_415	0.1	5.09009e-05	0.995775
DPC1_DY	0.1	5.09009e-05	0.995826
DPC1_IK	0.1	5.09009e-05	0.995877
CTC_425	0.1	5.09009e-05	0.995928
DPC1_CF	0.1	5.09009e-05	0.995979
CTC_427	0.1	5.09009e-05	0.99603
CTC_646	0.1	5.09009e-05	0.996081
DPC1_IV	0.1	5.09009e-05	0.996132
CTC_366	0.1	5.09009e-05	0.996182
DPC1_NK	0.1	5.09009e-05	0.996233
DPC1_CV	0.1	5.09009e-05	0.996284
CeTD_SS2	0.1	5.09009e-05	0.996335
CTC_463	0.1	5.09009e-05	0.996386
TPC_TLA	0.1	5.09009e-05	0.996437
CTC_346	0.1	5.09009e-05	0.996488
TPC_CTK	0.1	5.09009e-05	0.996539
DPC1_YR	0.1	5.09009e-05	0.99659
DPC1_NF	0.1	5.09009e-05	0.996641
TPC_RAA	0.1	5.09009e-05	0.996691
CTC_355	0.1	5.09009e-05	0.996742
DPC1_YE	0.1	5.09009e-05	0.996793
TPC_FCR	0.1	5.09009e-05	0.996844
TPC_GRC	0.1	5.09009e-05	0.996895
TPC_SCK	0.1	5.09009e-05	0.996946
TPC_KRT	0.1	5.09009e-05	0.996997
CTC_454	0.1	5.09009e-05	0.997048
CTC_253	0.1	5.09009e-05	0.997099
TPC_FPC	0.1	5.09009e-05	0.99715
CTC_251	0.1	5.09009e-05	0.9972
CTC_142	0.1	5.09009e-05	0.997251
DPC1_QT	0.1	5.09009e-05	0.997302
TPC_CCL	0.1	5.09009e-05	0.997353
CTC_526	0.1	5.09009e-05	0.997404
DPC1_PK	0.1	5.09009e-05	0.997455
DPC1_EE	0.1	5.09009e-05	0.997506
CTC_161	0.1	5.09009e-05	0.997557
TPC_CCR	0.1	5.09009e-05	0.997608
DPC1_EI	0.1	5.09009e-05	0.997659
CTC_154	0.1	5.09009e-05	0.997709
CTC_151	0.1	5.09009e-05	0.99776
CTC_146	0.1	5.09009e-05	0.997811
CTC_535	0.1	5.09009e-05	0.997862
CTC_144	0.1	5.09009e-05	0.997913
DPC1_TI	0.1	5.09009e-05	0.997964
DPC1_LC	0.1	5.09009e-05	0.998015
DPC1_HL	0.1	5.09009e-05	0.998066
DPC1_TH	0.1	5.09009e-05	0.998117
TPC_GEC	0.1	5.09009e-05	0.998168
CTC_133	0.1	5.09009e-05	0.998218
DPC1_RH	0.1	5.09009e-05	0.998269
CTC_131	0.1	5.09009e-05	0.99832
CTC_556	0.1	5.09009e-05	0.998371
CTC_126	0.1	5.09009e-05	0.998422
CTC_124	0.1	5.09009e-05	0.998473
DPC1_RR	0.1	5.09009e-05	0.998524
DPC1_RV	0.1	5.09009e-05	0.998575
CTC_545	0.1	5.09009e-05	0.998626
DPC1_SN	0.1	5.09009e-05	0.998677
DPC1_SK	0.1	5.09009e-05	0.998727
DPC1_SE	0.1	5.09009e-05	0.998778
TPC_GCP	0.1	5.09009e-05	0.998829
TPC_CRA	0.1	5.09009e-05	0.99888
CTC_645	0.1	5.09009e-05	0.998931
DPC1_PL	0.1	5.09009e-05	0.998982
DPC1_GY	0.1	5.09009e-05	0.999033
DPC1_QD	0.1	5.09009e-05	0.999084
TPC_ELA	0.1	5.09009e-05	0.999135
DPC1_FV	0.1	5.09009e-05	0.999186
RRI_R	0.1	5.09009e-05	0.999236
DPC1_PR	0.1	5.09009e-05	0.999287
CTC_217	0.1	5.09009e-05	0.999338
TPC_CLC	0.1	5.09009e-05	0.999389
TPC_RKR	0.1	5.09009e-05	0.99944
CTC_522	0.1	5.09009e-05	0.999491
CTC_214	0.1	5.09009e-05	0.999542
DPC1_TT	0.1	5.09009e-05	0.999593
RRI_S	0.1	5.09009e-05	0.999644
CTC_236	0.1	5.09009e-05	0.999695
DPC1_PP	0.1	5.09009e-05	0.999745
DPC1_GM	0.1	5.09009e-05	0.999796
CTC_177	0.1	5.09009e-05	0.999847
DPC1_DS	0.1	5.09009e-05	0.999898
CTC_524	0.1	5.09009e-05	0.999949
SEP_CY	0	0	1
DPC1_VT	0	0	1
DPC1_WC	0	0	1
RRI_Q	0	0	1
RRI_P	0	0	1
RRI_N	0	0	1
RRI_M	0	0	1
RRI_I	0	0	1
RRI_H	0	0	1
RRI_F	0	0	1
DPC1_YY	0	0	1
DPC1_YW	0	0	1
DPC1_YP	0	0	1
CTC_137	0	0	1
DPC1_YN	0	0	1
DPC1_YI	0	0	1
DPC1_YF	0	0	1
DPC1_WY	0	0	1
DPC1_WW	0	0	1
DPC1_WV	0	0	1
DPC1_WR	0	0	1
DPC1_WQ	0	0	1
DPC1_WP	0	0	1
DPC1_WN	0	0	1
DPC1_WM	0	0	1
DPC1_WL	0	0	1
DPC1_WI	0	0	1
DPC1_WH	0	0	1
DPC1_YM	0	0	1
CTC_167	0	0	1
DPC1_QW	0	0	1
CTC_165	0	0	1
CTC_575	0	0	1
CTC_755	0	0	1
DPC1_MM	0	0	1
CTC_417	0	0	1
SEP_BS	0	0	1
SEP_NE_pH	0	0	1
DPC1_TW	0	0	1
DPC1_TM	0	0	1
DPC1_TE	0	0	1
DPC1_SW	0	0	1
DPC1_SV	0	0	1
DPC1_SI	0	0	1
SEP_LR	0	0	1
DPC1_RY	0	0	1
DPC1_RW	0	0	1
CTC_117	0	0	1
CTC_134	0	0	1
SEP_AC	0	0	1
CTC_135	0	0	1
DPC1_RF	0	0	1
CTC_145	0	0	1
CTC_147	0	0	1
DPC1_RE	0	0	1
DPC1_QY	0	0	1
CTC_156	0	0	1
CTC_157	0	0	1
CTC_162	0	0	1
CTC_163	0	0	1
CTC_164	0	0	1
DPC1_WG	0	0	1
DPC1_WF	0	0	1
DPC1_MS	0	0	1
DPC1_WD	0	0	1
DPC1_NW	0	0	1
CTC_313	0	0	1
DPC1_PC	0	0	1
CTC_176	0	0	1
DPC1_QQ	0	0	1
DPC1_QN	0	0	1
DPC1_QM	0	0	1
DPC1_QH	0	0	1
DPC1_QF	0	0	1
CTC_227	0	0	1
DPC1_PY	0	0	1
CTC_237	0	0	1
DPC1_PM	0	0	1
CTC_357	0	0	1
CTC_242	0	0	1
CTC_247	0	0	1
CTC_252	0	0	1
CTC_254	0	0	1
CTC_255	0	0	1
CTC_256	0	0	1
CTC_257	0	0	1
CTC_261	0	0	1
CTC_263	0	0	1
CTC_264	0	0	1
CTC_265	0	0	1
CTC_267	0	0	1
CTC_272	0	0	1
CTC_273	0	0	1
CTC_244	0	0	1
DPC1_MP	0	0	1
CTC_414	0	0	1
CTC_674	0	0	1
CTC_172	0	0	1
DPC1_MN	0	0	1
CTC_173	0	0	1
CTC_175	0	0	1
DPC1_NV	0	0	1
DPC1_NT	0	0	1
CTC_323	0	0	1
CTC_324	0	0	1
CTC_327	0	0	1
DPC1_NQ	0	0	1
DPC1_NN	0	0	1
CTC_334	0	0	1
CTC_337	0	0	1
DPC1_NH	0	0	1
CTC_345	0	0	1
CTC_347	0	0	1
CTC_354	0	0	1
CTC_317	0	0	1
CTC_356	0	0	1
DPC1_NC	0	0	1
DPC1_MY	0	0	1
DPC1_MW	0	0	1
CTC_367	0	0	1
DPC1_MV	0	0	1
CTC_372	0	0	1
CTC_373	0	0	1
CTC_374	0	0	1
CTC_375	0	0	1
CTC_376	0	0	1
DPC1_WE	0	0	1
CTC_673	0	0	1
CTC_754	0	0	1
CTC_671	0	0	1
CTC_514	0	0	1
CTC_513	0	0	1
DPC1_LT	0	0	1
CTC_432	0	0	1
CTC_433	0	0	1
DPC1_MI	0	0	1
CTC_435	0	0	1
DPC1_MH	0	0	1
CTC_437	0	0	1
CTC_441	0	0	1
DPC1_MF	0	0	1
CTC_444	0	0	1
CTC_445	0	0	1
CTC_547	0	0	1
CTC_447	0	0	1
CTC_452	0	0	1
CTC_453	0	0	1
CTC_455	0	0	1
CTC_456	0	0	1
CTC_457	0	0	1
CTC_461	0	0	1
CTC_462	0	0	1
DPC1_MA	0	0	1
CTC_467	0	0	1
CTC_471	0	0	1
CTC_472	0	0	1
CTC_473	0	0	1
CTC_474	0	0	1
DPC1_MD	0	0	1
DPC1_KM	0	0	1
CTC_571	0	0	1
CTC_567	0	0	1
TPC_CIE	0	0	1
TPC_CSL	0	0	1
TPC_ALC	0	0	1
TPC_AKY	0	0	1
CTC_516	0	0	1
CTC_517	0	0	1
DPC1_LM	0	0	1
CTC_523	0	0	1
DPC1_LH	0	0	1
CTC_527	0	0	1
CTC_531	0	0	1
CTC_532	0	0	1
DPC1_LG	0	0	1
CTC_534	0	0	1
CTC_541	0	0	1
CTC_543	0	0	1
CTC_544	0	0	1
DPC1_LP	0	0	1
CTC_546	0	0	1
DPC1_KW	0	0	1
DPC1_KN	0	0	1
CTC_554	0	0	1
CTC_555	0	0	1
CTC_557	0	0	1
CTC_561	0	0	1
CTC_562	0	0	1
CTC_563	0	0	1
CTC_564	0	0	1
CTC_565	0	0	1
CTC_475	0	0	1
CTC_672	0	0	1
CTC_476	0	0	1
DPC1_LW	0	0	1
CTC_677	0	0	1
CTC_676	0	0	1
CTC_675	0	0	1
CTC_577	0	0	1
CTC_612	0	0	1
CTC_616	0	0	1
CTC_617	0	0	1
CTC_621	0	0	1
CTC_622	0	0	1
DPC1_IW	0	0	1
CTC_625	0	0	1
CTC_626	0	0	1
CTC_627	0	0	1
CTC_734	0	0	1
CTC_636	0	0	1
DPC1_II	0	0	1
CTC_643	0	0	1
CTC_644	0	0	1
CTC_647	0	0	1
CTC_651	0	0	1
CTC_652	0	0	1
CTC_653	0	0	1
DPC1_HY	0	0	1
CTC_657	0	0	1
DPC1_HW	0	0	1
CTC_664	0	0	1
CTC_665	0	0	1
CTC_667	0	0	1
CTC_637	0	0	1
CTC_274	0	0	1
CTC_753	0	0	1
CTC_752	0	0	1
CTC_573	0	0	1
CTC_424	0	0	1
CTC_574	0	0	1
CTC_576	0	0	1
CTC_712	0	0	1
CTC_713	0	0	1
CTC_714	0	0	1
CTC_715	0	0	1
CTC_717	0	0	1
CTC_722	0	0	1
CTC_723	0	0	1
CTC_724	0	0	1
CTC_725	0	0	1
CTC_726	0	0	1
CTC_727	0	0	1
CTC_731	0	0	1
CTC_732	0	0	1
CTC_711	0	0	1
CTC_733	0	0	1
CTC_735	0	0	1
CTC_736	0	0	1
CTC_737	0	0	1
CTC_741	0	0	1
CTC_742	0	0	1
CTC_743	0	0	1
DPC1_HT	0	0	1
CTC_745	0	0	1
CTC_747	0	0	1
CTC_751	0	0	1
CTC_477	0	0	1
CTC_275	0	0	1
TPC_AGN	0	0	1
CTC_277	0	0	1
PAAC1_W	0	0	1
PAAC1_V	0	0	1
PAAC1_T	0	0	1
CTC_762	0	0	1
CTC_763	0	0	1
CTC_764	0	0	1
CTC_765	0	0	1
CTC_766	0	0	1
CTC_767	0	0	1
CTC_771	0	0	1
CTC_772	0	0	1
CTC_773	0	0	1
CTC_774	0	0	1
APAAC1_Q	0	0	1
CTC_775	0	0	1
CTC_777	0	0	1
PAAC1_A	0	0	1
PAAC1_C	0	0	1
PAAC1_D	0	0	1
PAAC1_E	0	0	1
PAAC1_F	0	0	1
PAAC1_G	0	0	1
PAAC1_H	0	0	1
PAAC1_I	0	0	1
PAAC1_K	0	0	1
PAAC1_L	0	0	1
PAAC1_M	0	0	1
PAAC1_N	0	0	1
CTC_776	0	0	1
DPC1_HF	0	0	1
DPC1_HH	0	0	1
DPC1_HI	0	0	1
TPC_AGT	0	0	1
TPC_ADN	0	0	1
TPC_ADM	0	0	1
TPC_ADL	0	0	1
DPC1_HS	0	0	1
APAAC1_A	0	0	1
APAAC1_C	0	0	1
APAAC1_D	0	0	1
APAAC1_E	0	0	1
APAAC1_F	0	0	1
APAAC1_G	0	0	1
APAAC1_H	0	0	1
APAAC1_I	0	0	1
APAAC1_K	0	0	1
APAAC1_L	0	0	1
APAAC1_M	0	0	1
APAAC1_N	0	0	1
PAAC1_Y	0	0	1
APAAC1_P	0	0	1
APAAC1_R	0	0	1
APAAC1_S	0	0	1
APAAC1_T	0	0	1
APAAC1_V	0	0	1
APAAC1_W	0	0	1
APAAC1_Y	0	0	1
DPC1_HQ	0	0	1
DPC1_HP	0	0	1
DPC1_HM	0	0	1
DPC1_HK	0	0	1
PAAC1_P	0	0	1
TPC_AIH	0	0	1
PAAC1_Q	0	0	1
PAAC1_S	0	0	1
TPC_AAW	0	0	1
TPC_ALA	0	0	1
TPC_AAV	0	0	1
TPC_AAS	0	0	1
DPC1_GA	0	0	1
DPC1_FW	0	0	1
DPC1_FP	0	0	1
DPC1_FM	0	0	1
QSO1_G_F	0	0	1
QSO1_G_H	0	0	1
QSO1_G_K	0	0	1
DPC1_FH	0	0	1
QSO1_G_M	0	0	1
TPC_ADK	0	0	1
DPC1_FF	0	0	1
DPC1_EW	0	0	1
QSO1_G1	0	0	1
DPC1_ET	0	0	1
TPC_AAA	0	0	1
TPC_AAC	0	0	1
TPC_AAD	0	0	1
TPC_AAE	0	0	1
TPC_AAF	0	0	1
TPC_AAG	0	0	1
TPC_AAH	0	0	1
TPC_AAI	0	0	1
TPC_AAK	0	0	1
TPC_AAL	0	0	1
QSO1_G_W	0	0	1
TPC_ADI	0	0	1
TPC_ADH	0	0	1
TPC_ADG	0	0	1
DPC1_HD	0	0	1
DPC1_HA	0	0	1
DPC1_GN	0	0	1
DPC1_GE	0	0	1
TPC_AAY	0	0	1
TPC_ACA	0	0	1
TPC_ACC	0	0	1
TPC_ACD	0	0	1
TPC_ACE	0	0	1
TPC_ACF	0	0	1
TPC_ACG	0	0	1
TPC_ACH	0	0	1
TPC_ACI	0	0	1
TPC_ACL	0	0	1
TPC_ACM	0	0	1
TPC_ACN	0	0	1
TPC_ACP	0	0	1
TPC_ACQ	0	0	1
TPC_ACR	0	0	1
TPC_ACS	0	0	1
TPC_ACT	0	0	1
TPC_ACV	0	0	1
TPC_ACW	0	0	1
TPC_ACY	0	0	1
TPC_ADA	0	0	1
TPC_ADC	0	0	1
TPC_ADD	0	0	1
TPC_ADE	0	0	1
TPC_ADF	0	0	1
PAAC1_R	0	0	1
CTC_276	0	0	1
TPC_AIG	0	0	1
TPC_AIE	0	0	1
TPC_AFF	0	0	1
TPC_AFE	0	0	1
TPC_AFD	0	0	1
TPC_ADQ	0	0	1
TPC_ADR	0	0	1
TPC_ADS	0	0	1
TPC_ADT	0	0	1
TPC_ADV	0	0	1
TPC_ADW	0	0	1
TPC_ADY	0	0	1
TPC_AEA	0	0	1
TPC_AEC	0	0	1
TPC_AED	0	0	1
TPC_AGA	0	0	1
TPC_AEE	0	0	1
TPC_AEG	0	0	1
TPC_AEH	0	0	1
TPC_AEI	0	0	1
TPC_AEK	0	0	1
TPC_AEL	0	0	1
TPC_AEM	0	0	1
TPC_AEN	0	0	1
TPC_AEP	0	0	1
TPC_AEQ	0	0	1
TPC_AER	0	0	1
TPC_AES	0	0	1
TPC_AET	0	0	1
TPC_AEV	0	0	1
TPC_AEF	0	0	1
TPC_AGQ	0	0	1
TPC_AGP	0	0	1
TPC_CIC	0	0	1
CTC_174	0	0	1
CTC_756	0	0	1
CTC_757	0	0	1
CTC_761	0	0	1
TPC_AFH	0	0	1
TPC_AFI	0	0	1
TPC_AFK	0	0	1
TPC_AFL	0	0	1
TPC_AFM	0	0	1
TPC_AFN	0	0	1
TPC_AFP	0	0	1
TPC_AFQ	0	0	1
TPC_AFR	0	0	1
TPC_AFS	0	0	1
TPC_AFT	0	0	1
TPC_AFV	0	0	1
TPC_AFW	0	0	1
TPC_AFG	0	0	1
TPC_AFY	0	0	1
TPC_AGC	0	0	1
TPC_AGD	0	0	1
TPC_AGE	0	0	1
TPC_AGF	0	0	1
TPC_AGG	0	0	1
TPC_AGH	0	0	1
TPC_AGI	0	0	1
TPC_AGK	0	0	1
TPC_AGL	0	0	1
TPC_AGM	0	0	1
TPC_AEW	0	0	1
TPC_AIF	0	0	1
TPC_AEY	0	0	1
TPC_AFC	0	0	1
TPC_AIL	0	0	1
TPC_AIK	0	0	1
TPC_AII	0	0	1
TPC_AGW	0	0	1
TPC_AGY	0	0	1
TPC_AHA	0	0	1
TPC_AHC	0	0	1
TPC_AHD	0	0	1
TPC_AHE	0	0	1
TPC_AHF	0	0	1
TPC_AHG	0	0	1
TPC_AHH	0	0	1
TPC_AHI	0	0	1
TPC_AKG	0	0	1
TPC_AHK	0	0	1
TPC_AHM	0	0	1
TPC_AHN	0	0	1
TPC_AHP	0	0	1
TPC_AHQ	0	0	1
TPC_AHR	0	0	1
TPC_AHS	0	0	1
TPC_AHT	0	0	1
TPC_AHV	0	0	1
TPC_AHW	0	0	1
TPC_AHY	0	0	1
TPC_AIA	0	0	1
TPC_AIC	0	0	1
TPC_AID	0	0	1
TPC_AHL	0	0	1
TPC_AKW	0	0	1
TPC_AKV	0	0	1
TPC_AKT	0	0	1
TPC_AGR	0	0	1
TPC_ADP	0	0	1
TPC_AGS	0	0	1
TPC_AGV	0	0	1
TPC_AIN	0	0	1
TPC_AIP	0	0	1
TPC_AIQ	0	0	1
TPC_AIR	0	0	1
TPC_AIS	0	0	1
TPC_AIT	0	0	1
TPC_AIV	0	0	1
TPC_AIW	0	0	1
TPC_AIY	0	0	1
TPC_AKA	0	0	1
TPC_AKC	0	0	1
TPC_AKD	0	0	1
TPC_AKE	0	0	1
TPC_AIM	0	0	1
TPC_AKF	0	0	1
TPC_AKH	0	0	1
TPC_AKI	0	0	1
TPC_AKK	0	0	1
TPC_AKL	0	0	1
TPC_AKM	0	0	1
TPC_AKN	0	0	1
TPC_AKP	0	0	1
TPC_AKQ	0	0	1
TPC_AKR	0	0	1
TPC_AKS	0	0	1
TPC_AFA	0	0	1
TPC_CIA	0	0	1
TPC_APF	0	0	1
TPC_CHW	0	0	1
TPC_AMQ	0	0	1
TPC_AMP	0	0	1
TPC_ALE	0	0	1
TPC_ALF	0	0	1
TPC_ALG	0	0	1
TPC_ALH	0	0	1
TPC_ALI	0	0	1
TPC_ALK	0	0	1
TPC_ALL	0	0	1
TPC_ALM	0	0	1
TPC_ALN	0	0	1
TPC_ALP	0	0	1
TPC_ALQ	0	0	1
TPC_AMR	0	0	1
TPC_ALR	0	0	1
TPC_ALT	0	0	1
TPC_ALV	0	0	1
TPC_ALW	0	0	1
TPC_ALY	0	0	1
TPC_AMA	0	0	1
TPC_AMC	0	0	1
TPC_AMD	0	0	1
TPC_AME	0	0	1
TPC_AMF	0	0	1
TPC_AMG	0	0	1
TPC_AMH	0	0	1
TPC_AMI	0	0	1
TPC_AMK	0	0	1
TPC_ALS	0	0	1
TPC_ANM	0	0	1
TPC_APE	0	0	1
TPC_APD	0	0	1
TPC_CDE	0	0	1
TPC_ASP	0	0	1
TPC_ASM	0	0	1
TPC_AMT	0	0	1
TPC_AMV	0	0	1
TPC_AMW	0	0	1
TPC_AMY	0	0	1
TPC_ANA	0	0	1
TPC_ANC	0	0	1
TPC_AND	0	0	1
TPC_ANE	0	0	1
TPC_ANF	0	0	1
TPC_ANG	0	0	1
TPC_ANH	0	0	1
TPC_ANI	0	0	1
TPC_ANK	0	0	1
TPC_AMS	0	0	1
TPC_ANL	0	0	1
TPC_ANN	0	0	1
TPC_ANP	0	0	1
TPC_ANQ	0	0	1
TPC_ANR	0	0	1
TPC_ANS	0	0	1
TPC_ANT	0	0	1
TPC_ANV	0	0	1
TPC_ANW	0	0	1
TPC_ANY	0	0	1
TPC_APA	0	0	1
TPC_APC	0	0	1
TPC_AML	0	0	1
TPC_AWV	0	0	1
TPC_AMM	0	0	1
TPC_AAM	0	0	1
TPC_AQW	0	0	1
TPC_AQV	0	0	1
TPC_APK	0	0	1
TPC_APL	0	0	1
TPC_APM	0	0	1
TPC_APN	0	0	1
TPC_APP	0	0	1
TPC_APQ	0	0	1
TPC_APR	0	0	1
TPC_APS	0	0	1
TPC_APT	0	0	1
TPC_APV	0	0	1
TPC_APW	0	0	1
TPC_AQY	0	0	1
TPC_APY	0	0	1
TPC_AQC	0	0	1
TPC_AQD	0	0	1
TPC_AQE	0	0	1
TPC_AQF	0	0	1
TPC_AQG	0	0	1
TPC_AQH	0	0	1
TPC_AQI	0	0	1
TPC_AQK	0	0	1
TPC_AQL	0	0	1
TPC_AQM	0	0	1
TPC_AQN	0	0	1
TPC_AQP	0	0	1
TPC_AQQ	0	0	1
TPC_AQA	0	0	1
TPC_ART	0	0	1
TPC_ASL	0	0	1
TPC_ASK	0	0	1
TPC_ASN	0	0	1
TPC_APG	0	0	1
TPC_API	0	0	1
TPC_ARC	0	0	1
TPC_ARD	0	0	1
TPC_ARE	0	0	1
TPC_ARF	0	0	1
TPC_ARG	0	0	1
TPC_ARH	0	0	1
TPC_ARI	0	0	1
TPC_ARK	0	0	1
TPC_ARM	0	0	1
TPC_ARN	0	0	1
TPC_ARP	0	0	1
TPC_ARQ	0	0	1
TPC_ARR	0	0	1
TPC_ARA	0	0	1
TPC_ARS	0	0	1
TPC_ARV	0	0	1
TPC_ARW	0	0	1
TPC_ARY	0	0	1
TPC_ASA	0	0	1
TPC_ASC	0	0	1
TPC_ASD	0	0	1
TPC_ASE	0	0	1
TPC_ASF	0	0	1
TPC_ASG	0	0	1
TPC_ASH	0	0	1
TPC_ASI	0	0	1
TPC_AMN	0	0	1
TPC_AQR	0	0	1
TPC_CAI	0	0	1
TPC_CAG	0	0	1
TPC_AVF	0	0	1
TPC_AVE	0	0	1
TPC_ASR	0	0	1
TPC_ASS	0	0	1
TPC_AST	0	0	1
TPC_ASV	0	0	1
TPC_ASW	0	0	1
TPC_ASY	0	0	1
TPC_ATA	0	0	1
TPC_ATC	0	0	1
TPC_ATD	0	0	1
TPC_ATE	0	0	1
TPC_ATF	0	0	1
TPC_AVG	0	0	1
TPC_ATG	0	0	1
TPC_ATI	0	0	1
TPC_ATK	0	0	1
TPC_ATL	0	0	1
TPC_ATM	0	0	1
TPC_ATN	0	0	1
TPC_ATP	0	0	1
TPC_ATQ	0	0	1
TPC_ATR	0	0	1
TPC_ATS	0	0	1
TPC_ATT	0	0	1
TPC_ATV	0	0	1
TPC_ATW	0	0	1
TPC_ATY	0	0	1
TPC_ATH	0	0	1
TPC_AWC	0	0	1
TPC_AWR	0	0	1
TPC_AWQ	0	0	1
TPC_FIW	0	0	1
TPC_FIV	0	0	1
TPC_FIT	0	0	1
TPC_AVI	0	0	1
TPC_AVK	0	0	1
TPC_AVL	0	0	1
TPC_AVM	0	0	1
TPC_AVN	0	0	1
TPC_AVP	0	0	1
TPC_AVQ	0	0	1
TPC_AVR	0	0	1
TPC_AVS	0	0	1
TPC_AVT	0	0	1
TPC_AVV	0	0	1
TPC_AVW	0	0	1
TPC_AVY	0	0	1
TPC_AVH	0	0	1
TPC_AWA	0	0	1
TPC_AWD	0	0	1
TPC_AWE	0	0	1
TPC_AWF	0	0	1
TPC_AWG	0	0	1
TPC_AWH	0	0	1
TPC_AWI	0	0	1
TPC_AWK	0	0	1
TPC_AWL	0	0	1
TPC_AWM	0	0	1
TPC_AWN	0	0	1
TPC_AWP	0	0	1
TPC_AVA	0	0	1
TPC_CAH	0	0	1
TPC_AVC	0	0	1
TPC_AWS	0	0	1
TPC_CAL	0	0	1
TPC_CAK	0	0	1
TPC_AWY	0	0	1
TPC_AYA	0	0	1
TPC_AYC	0	0	1
TPC_AYD	0	0	1
TPC_AYE	0	0	1
TPC_AYF	0	0	1
TPC_AYG	0	0	1
TPC_AYH	0	0	1
TPC_AYI	0	0	1
TPC_AYK	0	0	1
TPC_AYL	0	0	1
TPC_CAM	0	0	1
TPC_AYM	0	0	1
TPC_AYP	0	0	1
TPC_AYQ	0	0	1
TPC_AYR	0	0	1
TPC_AYS	0	0	1
TPC_AYT	0	0	1
TPC_AYV	0	0	1
TPC_AYW	0	0	1
TPC_AYY	0	0	1
TPC_CAA	0	0	1
TPC_CAC	0	0	1
TPC_CAD	0	0	1
TPC_CAE	0	0	1
TPC_CAF	0	0	1
TPC_AYN	0	0	1
TPC_CCH	0	0	1
TPC_CDD	0	0	1
TPC_CDC	0	0	1
TPC_ASQ	0	0	1
TPC_AWT	0	0	1
TPC_AWW	0	0	1
TPC_CAP	0	0	1
TPC_CAQ	0	0	1
TPC_CAR	0	0	1
TPC_CAS	0	0	1
TPC_CAT	0	0	1
TPC_CAV	0	0	1
TPC_CAW	0	0	1
TPC_CAY	0	0	1
TPC_CCA	0	0	1
DPC1_EM	0	0	1
TPC_CCD	0	0	1
TPC_CCE	0	0	1
TPC_CCF	0	0	1
TPC_CAN	0	0	1
TPC_CCG	0	0	1
TPC_CCI	0	0	1
TPC_CCK	0	0	1
TPC_CCM	0	0	1
TPC_CCN	0	0	1
TPC_CCP	0	0	1
TPC_CCQ	0	0	1
TPC_CCT	0	0	1
TPC_CCV	0	0	1
TPC_CCW	0	0	1
TPC_CCY	0	0	1
TPC_CDA	0	0	1
TPC_AVD	0	0	1
TPC_CHY	0	0	1
TPC_AQS	0	0	1
TPC_APH	0	0	1
TPC_CEW	0	0	1
TPC_CEV	0	0	1
TPC_CDI	0	0	1
TPC_CDK	0	0	1
TPC_CDL	0	0	1
TPC_CDM	0	0	1
TPC_CDN	0	0	1
TPC_CDP	0	0	1
TPC_CDQ	0	0	1
TPC_CDR	0	0	1
TPC_CDS	0	0	1
TPC_CDT	0	0	1
TPC_CDV	0	0	1
TPC_CEY	0	0	1
TPC_CDW	0	0	1
TPC_CEA	0	0	1
TPC_CEC	0	0	1
TPC_CED	0	0	1
TPC_CEE	0	0	1
TPC_CEF	0	0	1
TPC_CEG	0	0	1
TPC_CEH	0	0	1
TPC_CEI	0	0	1
TPC_CEK	0	0	1
TPC_CEL	0	0	1
TPC_CEM	0	0	1
TPC_CEN	0	0	1
TPC_CEP	0	0	1
TPC_CDY	0	0	1
TPC_CFS	0	0	1
TPC_CGK	0	0	1
TPC_CGI	0	0	1
TPC_CKV	0	0	1
TPC_CKT	0	0	1
TPC_CKS	0	0	1
TPC_CFC	0	0	1
TPC_CFD	0	0	1
TPC_CFE	0	0	1
TPC_CFF	0	0	1
TPC_CFG	0	0	1
TPC_CFH	0	0	1
TPC_CFI	0	0	1
TPC_CFK	0	0	1
TPC_CFL	0	0	1
TPC_CFM	0	0	1
TPC_CFN	0	0	1
TPC_CFP	0	0	1
TPC_CFQ	0	0	1
TPC_CFA	0	0	1
TPC_CFR	0	0	1
TPC_CFT	0	0	1
TPC_CFV	0	0	1
TPC_CFW	0	0	1
TPC_CFY	0	0	1
TPC_CGA	0	0	1
TPC_CGC	0	0	1
TPC_CGD	0	0	1
TPC_CGE	0	0	1
TPC_CGF	0	0	1
TPC_CGG	0	0	1
TPC_CGH	0	0	1
TPC_CEQ	0	0	1
TPC_CPF	0	0	1
TPC_CES	0	0	1
TPC_CGL	0	0	1
TPC_ALD	0	0	1
TPC_CIF	0	0	1
TPC_CID	0	0	1
TPC_CGQ	0	0	1
TPC_CGR	0	0	1
TPC_CGS	0	0	1
TPC_CGT	0	0	1
TPC_CGV	0	0	1
TPC_CGW	0	0	1
TPC_CGY	0	0	1
TPC_CHA	0	0	1
TPC_CHC	0	0	1
TPC_CHD	0	0	1
TPC_CIG	0	0	1
TPC_CHE	0	0	1
TPC_CHG	0	0	1
TPC_CHH	0	0	1
TPC_CHI	0	0	1
TPC_CHK	0	0	1
TPC_CHL	0	0	1
TPC_CHM	0	0	1
TPC_CHN	0	0	1
TPC_CHP	0	0	1
TPC_CHQ	0	0	1
TPC_CHR	0	0	1
TPC_CHS	0	0	1
TPC_CHT	0	0	1
TPC_CHV	0	0	1
TPC_CHF	0	0	1
TPC_CKR	0	0	1
TPC_CKQ	0	0	1
TPC_CKP	0	0	1
TPC_CGM	0	0	1
TPC_CGN	0	0	1
TPC_CGP	0	0	1
TPC_CIH	0	0	1
TPC_CII	0	0	1
TPC_CIK	0	0	1
TPC_CIL	0	0	1
TPC_CIM	0	0	1
TPC_CIN	0	0	1
TPC_CIP	0	0	1
TPC_CIQ	0	0	1
TPC_CIR	0	0	1
TPC_CIS	0	0	1
TPC_CIT	0	0	1
TPC_CIV	0	0	1
TPC_CIW	0	0	1
TPC_CIY	0	0	1
TPC_CKA	0	0	1
TPC_CKC	0	0	1
TPC_CKD	0	0	1
TPC_CKE	0	0	1
TPC_CKF	0	0	1
TPC_CKG	0	0	1
TPC_CKH	0	0	1
TPC_CKI	0	0	1
TPC_CKK	0	0	1
TPC_CKL	0	0	1
TPC_CKM	0	0	1
TPC_CKN	0	0	1
TPC_CET	0	0	1
TPC_AQT	0	0	1
TPC_CQR	0	0	1
TPC_CQP	0	0	1
TPC_CMM	0	0	1
TPC_CML	0	0	1
TPC_CKY	0	0	1
TPC_CLA	0	0	1
TPC_CLD	0	0	1
TPC_CLE	0	0	1
TPC_CLF	0	0	1
TPC_CLG	0	0	1
TPC_CLH	0	0	1
TPC_CLI	0	0	1
TPC_CLK	0	0	1
TPC_CLL	0	0	1
TPC_CLM	0	0	1
TPC_CMN	0	0	1
TPC_CLN	0	0	1
TPC_CLQ	0	0	1
DPC1_EF	0	0	1
TPC_CLS	0	0	1
TPC_CLT	0	0	1
TPC_CLV	0	0	1
TPC_CLW	0	0	1
TPC_CLY	0	0	1
TPC_CMA	0	0	1
TPC_CMC	0	0	1
TPC_CMD	0	0	1
TPC_CME	0	0	1
TPC_CMF	0	0	1
TPC_CMG	0	0	1
TPC_CLP	0	0	1
TPC_CNI	0	0	1
TPC_CPC	0	0	1
TPC_CPA	0	0	1
TPC_CDF	0	0	1
TPC_CDG	0	0	1
TPC_CDH	0	0	1
TPC_CMQ	0	0	1
TPC_CMR	0	0	1
TPC_CMS	0	0	1
TPC_CMT	0	0	1
TPC_CMV	0	0	1
TPC_CMW	0	0	1
TPC_CMY	0	0	1
TPC_CNA	0	0	1
TPC_CNC	0	0	1
TPC_CND	0	0	1
TPC_CNE	0	0	1
TPC_CNF	0	0	1
TPC_CNG	0	0	1
TPC_CMP	0	0	1
TPC_CNH	0	0	1
TPC_CNK	0	0	1
TPC_CNL	0	0	1
TPC_CNM	0	0	1
TPC_CNN	0	0	1
TPC_CNP	0	0	1
TPC_CNQ	0	0	1
TPC_CNR	0	0	1
TPC_CNS	0	0	1
TPC_CNT	0	0	1
TPC_CNV	0	0	1
TPC_CNW	0	0	1
TPC_CMH	0	0	1
TPC_CQQ	0	0	1
TPC_CMI	0	0	1
TPC_CPD	0	0	1
TPC_CQT	0	0	1
TPC_CQS	0	0	1
TPC_CPH	0	0	1
TPC_CPI	0	0	1
TPC_CPK	0	0	1
TPC_CPL	0	0	1
TPC_CPM	0	0	1
TPC_CPN	0	0	1
TPC_CPP	0	0	1
TPC_CPQ	0	0	1
TPC_CPR	0	0	1
TPC_CPS	0	0	1
TPC_CPT	0	0	1
TPC_CQV	0	0	1
TPC_CPV	0	0	1
TPC_CPY	0	0	1
TPC_CQA	0	0	1
TPC_CQC	0	0	1
TPC_CQD	0	0	1
TPC_CQE	0	0	1
TPC_CQF	0	0	1
TPC_CQG	0	0	1
TPC_CQH	0	0	1
TPC_CQI	0	0	1
TPC_CQK	0	0	1
TPC_CQL	0	0	1
TPC_CQM	0	0	1
TPC_CQN	0	0	1
TPC_CPW	0	0	1
TPC_CRS	0	0	1
TPC_CSK	0	0	1
TPC_CSI	0	0	1
TPC_CKW	0	0	1
TPC_CPE	0	0	1
TPC_CPG	0	0	1
TPC_CQY	0	0	1
TPC_CRD	0	0	1
TPC_CRE	0	0	1
TPC_CRF	0	0	1
TPC_CRG	0	0	1
TPC_CRH	0	0	1
TPC_CRI	0	0	1
TPC_CRK	0	0	1
TPC_CRL	0	0	1
TPC_CRM	0	0	1
TPC_CRN	0	0	1
TPC_CRP	0	0	1
TPC_CRQ	0	0	1
TPC_CQW	0	0	1
TPC_CRR	0	0	1
TPC_CRT	0	0	1
TPC_CRV	0	0	1
TPC_CRW	0	0	1
TPC_CRY	0	0	1
TPC_CSA	0	0	1
TPC_CSC	0	0	1
TPC_CSD	0	0	1
TPC_CSE	0	0	1
TPC_CSF	0	0	1
TPC_CSG	0	0	1
TPC_CSH	0	0	1
TPC_CMK	0	0	1
TPC_AAN	0	0	1
TPC_FDR	0	0	1
TPC_AAQ	0	0	1
TPC_CWR	0	0	1
TPC_CWC	0	0	1
TPC_CVG	0	0	1
TPC_CVF	0	0	1
TPC_CVE	0	0	1
TPC_CSQ	0	0	1
TPC_CSR	0	0	1
TPC_CSS	0	0	1
TPC_CST	0	0	1
TPC_CSV	0	0	1
TPC_CSW	0	0	1
TPC_CSY	0	0	1
TPC_CTA	0	0	1
TPC_CWQ	0	0	1
TPC_CTC	0	0	1
TPC_CTE	0	0	1
TPC_CTF	0	0	1
TPC_CTG	0	0	1
TPC_CTH	0	0	1
TPC_CTI	0	0	1
TPC_CTL	0	0	1
TPC_CTM	0	0	1
TPC_CTN	0	0	1
TPC_CTP	0	0	1
TPC_CTQ	0	0	1
TPC_CTR	0	0	1
TPC_CTS	0	0	1
TPC_CTT	0	0	1
TPC_CTD	0	0	1
TPC_CWP	0	0	1
TPC_CWN	0	0	1
TPC_CWM	0	0	1
TPC_DHV	0	0	1
TPC_DHW	0	0	1
TPC_DGK	0	0	1
TPC_DDE	0	0	1
TPC_DDD	0	0	1
TPC_DDC	0	0	1
TPC_CVI	0	0	1
TPC_CVK	0	0	1
TPC_CVL	0	0	1
TPC_CVM	0	0	1
TPC_CVN	0	0	1
TPC_CVP	0	0	1
TPC_CVQ	0	0	1
TPC_CVR	0	0	1
TPC_CVS	0	0	1
TPC_CVT	0	0	1
TPC_CVV	0	0	1
TPC_CVW	0	0	1
TPC_CVY	0	0	1
TPC_CVH	0	0	1
TPC_CWA	0	0	1
TPC_CWD	0	0	1
TPC_CWE	0	0	1
TPC_CWF	0	0	1
TPC_CWG	0	0	1
TPC_CWH	0	0	1
TPC_CWI	0	0	1
TPC_CWK	0	0	1
TPC_CWL	0	0	1
TPC_CTV	0	0	1
TPC_DHT	0	0	1
TPC_CTW	0	0	1
TPC_CVA	0	0	1
TPC_DCY	0	0	1
TPC_DDA	0	0	1
TPC_DAN	0	0	1
TPC_DKN	0	0	1
TPC_DAM	0	0	1
TPC_DAK	0	0	1
TPC_CWY	0	0	1
TPC_CYA	0	0	1
TPC_CYC	0	0	1
TPC_CYD	0	0	1
TPC_CYE	0	0	1
TPC_CYF	0	0	1
TPC_CYG	0	0	1
TPC_DCW	0	0	1
TPC_CYH	0	0	1
TPC_CYK	0	0	1
TPC_CYL	0	0	1
TPC_CYM	0	0	1
TPC_CYN	0	0	1
TPC_CYP	0	0	1
TPC_CYQ	0	0	1
TPC_CYR	0	0	1
TPC_CYS	0	0	1
TPC_CYT	0	0	1
TPC_CYV	0	0	1
TPC_CYW	0	0	1
TPC_CYY	0	0	1
TPC_DAA	0	0	1
TPC_CYI	0	0	1
TPC_DCV	0	0	1
TPC_DCT	0	0	1
TPC_DCS	0	0	1
TPC_CVC	0	0	1
TPC_CVD	0	0	1
TPC_CWS	0	0	1
TPC_CWT	0	0	1
TPC_CWV	0	0	1
TPC_CWW	0	0	1
TPC_DAP	0	0	1
TPC_DAQ	0	0	1
TPC_DAR	0	0	1
TPC_DAS	0	0	1
TPC_DAT	0	0	1
TPC_DAV	0	0	1
TPC_DAW	0	0	1
TPC_DAY	0	0	1
TPC_DCA	0	0	1
TPC_DCC	0	0	1
TPC_DCD	0	0	1
TPC_DCE	0	0	1
TPC_DCF	0	0	1
TPC_DCG	0	0	1
TPC_DCH	0	0	1
TPC_DCI	0	0	1
TPC_DCK	0	0	1
TPC_DCL	0	0	1
TPC_DCM	0	0	1
TPC_DCN	0	0	1
TPC_DCP	0	0	1
TPC_DCQ	0	0	1
TPC_DCR	0	0	1
TPC_CTY	0	0	1
TPC_DAC	0	0	1
TPC_DHS	0	0	1
TPC_DHQ	0	0	1
TPC_DGG	0	0	1
TPC_DFP	0	0	1
TPC_DET	0	0	1
TPC_DES	0	0	1
TPC_DER	0	0	1
TPC_DDG	0	0	1
TPC_DDH	0	0	1
TPC_DDI	0	0	1
TPC_DDK	0	0	1
TPC_DDL	0	0	1
TPC_DDM	0	0	1
TPC_DDN	0	0	1
TPC_DDP	0	0	1
TPC_DGF	0	0	1
TPC_DDQ	0	0	1
TPC_DDS	0	0	1
TPC_DDT	0	0	1
TPC_DDV	0	0	1
TPC_DDW	0	0	1
TPC_DDY	0	0	1
TPC_DEA	0	0	1
TPC_DEC	0	0	1
TPC_DED	0	0	1
TPC_DEE	0	0	1
TPC_DEF	0	0	1
TPC_DEG	0	0	1
TPC_DEH	0	0	1
TPC_DEI	0	0	1
TPC_DDR	0	0	1
TPC_DGE	0	0	1
TPC_DGD	0	0	1
TPC_DGC	0	0	1
TPC_EYM	0	0	1
TPC_EYN	0	0	1
TPC_EYQ	0	0	1
TPC_ECS	0	0	1
TPC_ECR	0	0	1
TPC_ECQ	0	0	1
TPC_DEW	0	0	1
TPC_DEY	0	0	1
TPC_DFA	0	0	1
TPC_DFC	0	0	1
TPC_DFD	0	0	1
TPC_DFE	0	0	1
TPC_DFF	0	0	1
TPC_DFG	0	0	1
TPC_DFH	0	0	1
TPC_DFI	0	0	1
TPC_DFK	0	0	1
TPC_DFL	0	0	1
TPC_DFM	0	0	1
TPC_DEV	0	0	1
TPC_DFN	0	0	1
TPC_DFQ	0	0	1
TPC_DFR	0	0	1
TPC_DFS	0	0	1
TPC_DFT	0	0	1
TPC_DFV	0	0	1
TPC_DFW	0	0	1
TPC_DFY	0	0	1
TPC_DGA	0	0	1
TPC_DEK	0	0	1
TPC_DHR	0	0	1
TPC_DEL	0	0	1
TPC_DEN	0	0	1
TPC_DKM	0	0	1
TPC_DIV	0	0	1
TPC_DIC	0	0	1
TPC_DIA	0	0	1
TPC_DHY	0	0	1
TPC_DGM	0	0	1
TPC_DGN	0	0	1
TPC_DGP	0	0	1
TPC_DGQ	0	0	1
TPC_DGR	0	0	1
TPC_DGS	0	0	1
TPC_DGT	0	0	1
TPC_DGV	0	0	1
TPC_DKL	0	0	1
TPC_DGW	0	0	1
TPC_DHA	0	0	1
TPC_DHC	0	0	1
TPC_DHD	0	0	1
TPC_DHE	0	0	1
TPC_DHF	0	0	1
TPC_DHG	0	0	1
TPC_DHH	0	0	1
TPC_DHI	0	0	1
TPC_DHK	0	0	1
TPC_DHL	0	0	1
TPC_DHM	0	0	1
TPC_DHN	0	0	1
TPC_DHP	0	0	1
TPC_DGY	0	0	1
TPC_DKK	0	0	1
TPC_DKI	0	0	1
TPC_DKH	0	0	1
TPC_DEP	0	0	1
TPC_DEQ	0	0	1
TPC_DGH	0	0	1
TPC_DDF	0	0	1
TPC_DGI	0	0	1
TPC_DGL	0	0	1
TPC_DIE	0	0	1
TPC_DIF	0	0	1
TPC_DIG	0	0	1
TPC_DIH	0	0	1
TPC_DII	0	0	1
TPC_DIK	0	0	1
TPC_DIL	0	0	1
TPC_DIM	0	0	1
TPC_DIN	0	0	1
TPC_DIP	0	0	1
TPC_DIQ	0	0	1
TPC_DIR	0	0	1
TPC_DIS	0	0	1
TPC_DID	0	0	1
TPC_DIT	0	0	1
TPC_DIW	0	0	1
TPC_DIY	0	0	1
TPC_DKA	0	0	1
TPC_DKC	0	0	1
TPC_DKD	0	0	1
TPC_DKE	0	0	1
TPC_DKF	0	0	1
TPC_DKG	0	0	1
TPC_DEM	0	0	1
TPC_EYL	0	0	1
TPC_DAD	0	0	1
TPC_DAF	0	0	1
TPC_DNS	0	0	1
TPC_DNT	0	0	1
TPC_DND	0	0	1
TPC_DMH	0	0	1
TPC_DMG	0	0	1
TPC_DMF	0	0	1
TPC_DKS	0	0	1
TPC_DKT	0	0	1
TPC_DKV	0	0	1
TPC_DKW	0	0	1
TPC_DKY	0	0	1
TPC_DLA	0	0	1
TPC_DLC	0	0	1
TPC_DNR	0	0	1
TPC_DLD	0	0	1
TPC_DLF	0	0	1
TPC_DLG	0	0	1
TPC_DLH	0	0	1
TPC_DLI	0	0	1
TPC_DLK	0	0	1
TPC_DLL	0	0	1
TPC_DLM	0	0	1
TPC_DLN	0	0	1
TPC_DLP	0	0	1
TPC_DLQ	0	0	1
TPC_DLR	0	0	1
TPC_DLS	0	0	1
TPC_DLT	0	0	1
TPC_DLE	0	0	1
TPC_DNQ	0	0	1
TPC_DNP	0	0	1
TPC_DNN	0	0	1
TPC_DYW	0	0	1
TPC_DYY	0	0	1
TPC_EAA	0	0	1
TPC_DWM	0	0	1
TPC_DSG	0	0	1
TPC_DSF	0	0	1
TPC_DSE	0	0	1
TPC_DMK	0	0	1
TPC_DML	0	0	1
TPC_DMM	0	0	1
TPC_DMN	0	0	1
TPC_DMP	0	0	1
TPC_DMQ	0	0	1
TPC_DMR	0	0	1
TPC_DMS	0	0	1
TPC_DMT	0	0	1
TPC_DMV	0	0	1
TPC_DMW	0	0	1
[truncated: 6,968 more rows]

## Sheet: Table 2 (selected features)
feature	importance	normalized_importance	cumulative_importance
AAC_C	238.8	0.0841378	0.0841378
CeTD_SS1	176.4	0.0621521	0.14629
CeTD_VW2	144.1	0.0507716	0.197062
SOC1_G1	111.7	0.0393559	0.236417
BTC_T	101.2	0.0356564	0.272074
BTC_H	97.2	0.0342471	0.306321
DDR_L	94.6	0.033331	0.339652
AAC_N	91.7	0.0323092	0.371961
CeTD_CH3	86.5	0.0304771	0.402438
CeTD_HB3	82.7	0.0291382	0.431576
DDR_G	82.2	0.028962	0.460538
BTC_D	80.2	0.0282573	0.488796
DDR_C	79.2	0.027905	0.516701
AAC_G	77.4	0.0272708	0.543972
APAAC1_L	77.3	0.0272356	0.571207
AAC_Q	75.4	0.0265661	0.597773
CeTD_CH2	72.7	0.0256148	0.623388
CeTD_PZ2	69.4	0.0244521	0.64784
DDR_S	60.6	0.0213516	0.669192
AAC_R	57.4	0.0202241	0.689416
DDR_M	57	0.0200832	0.709499
DDR_E	55.7	0.0196251	0.729124
DDR_R	54.5	0.0192023	0.748326
PAAC1_P	47.2	0.0166303	0.764957
DDR_I	45.1	0.0158904	0.780847
DDR_V	42.7	0.0150447	0.795892
DDR_T	38.2	0.0134592	0.809351
DDR_H	38	0.0133888	0.82274
DDR_D	37.9	0.0133535	0.836093
DPC1_FL	36.7	0.0129307	0.849024
DDR_A	35	0.0123318	0.861356
DDR_Y	33.6	0.0118385	0.873194
BTC_S	33	0.0116271	0.884821
DPC1_ES	32	0.0112748	0.896096
DDR_Q	29	0.0102177	0.906314
DDR_N	28.9	0.0101825	0.916496
AAC_V	27.7	0.00975971	0.926256
DPC1_KK	27.1	0.00954831	0.935804
DDR_F	24.2	0.00852653	0.944331
DDR_W	20	0.00704672	0.951378
DPC1_LY	19	0.00669438	0.958072
DPC1_LL	17.1	0.00602495	0.964097
DPC1_CR	13.5	0.00475654	0.968853
DPC1_LI	11	0.0038757	0.972729
DPC1_AS	10.8	0.00380523	0.976534
DPC1_SL	9.8	0.00345289	0.979987
PAAC1_C	8.2	0.00288916	0.982876
DPC1_RC	7.7	0.00271299	0.985589
DPC1_CC	7.3	0.00257205	0.988162
DPC1_LK	6	0.00211402	0.990276
DPC1_GI	5.1	0.00179691	0.992072
DPC1_KI	4.7	0.00165598	0.993728
DPC1_ND	4.2	0.00147981	0.995208
DPC1_KV	4.2	0.00147981	0.996688
DPC1_TS	3.6	0.00126841	0.997956
DPC1_IS	3	0.00105701	0.999013
DPC1_LG	1.6	0.000563738	0.999577
DPC1_WL	0.6	0.000211402	0.999789
TPC_CNY	0.5	0.000176168	0.999965
PAAC1_Q	0	0	1
TPC_VIT	0	0	1
APAAC1_C	0	0	1
PAAC1_R	0.1	3.52336e-05	1
APAAC1_R	0	0	1
APAAC1_P	0	0	1
PAAC1_N	0	0	1
APAAC1_V	0	0	1
PAAC1_G	0	0	1

## Sheet:  Table 3 (Performance )
TOP 10
svc											svc
Threshold	TP	FP	TN	FN	sens	spec	FPR	acc	auroc	mcc	Threshold	TP	FP	TN	FN	sens	spec	FPR	acc	auroc	mcc
0	829	843	0	0	100	0	100	49.5813	0.99017	0	0	207	211	0	0	100	0	100	49.5215	0.987957	0
0.1	818	120	723	11	98.6731	85.7651	14.2349	92.1651	0.99017	0.850708	0.1	202	32	179	5	97.5845	84.8341	15.1659	91.1483	0.987957	0.830109
0.2	810	70	773	19	97.7081	91.6963	8.30368	94.677	0.99017	0.895254	0.2	201	20	191	6	97.1014	90.5213	9.47867	93.7799	0.987957	0.877635
0.3	803	48	795	26	96.8637	94.306	5.69395	95.5742	0.99017	0.911812	0.3	201	14	197	6	97.1014	93.3649	6.63507	95.2153	0.987957	0.904995
0.4	794	33	810	35	95.778	96.0854	3.91459	95.933	0.99017	0.918656	0.4	200	9	202	7	96.6184	95.7346	4.2654	96.1722	0.987957	0.923487
0.5	789	25	818	40	95.1749	97.0344	2.9656	96.1124	0.99017	0.92238	0.5	200	7	204	7	96.6184	96.6825	3.31754	96.6507	0.987957	0.933008
0.6	784	21	822	45	94.5718	97.5089	2.4911	96.0526	0.99017	0.921408	0.6	198	3	208	9	95.6522	98.5782	1.4218	97.1292	0.987957	0.942952
0.7	776	11	832	53	93.6068	98.6951	1.30486	96.1722	0.99017	0.924576	0.7	198	3	208	9	95.6522	98.5782	1.4218	97.1292	0.987957	0.942952
0.8	770	8	835	59	92.883	99.051	0.948992	95.9928	0.99017	0.921528	0.8	197	3	208	10	95.1691	98.5782	1.4218	96.89	0.987957	0.9383
0.9	755	5	838	74	91.0736	99.4069	0.59312	95.2751	0.99017	0.908535	0.9	190	2	209	17	91.7874	99.0521	0.947867	95.4545	0.987957	0.911374
TOP 20
ETREES											ETREES
Threshold	TP	FP	TN	FN	sens	spec	FPR	acc	auroc	mcc	Threshold	TP	FP	TN	FN	sens	spec	FPR	acc	auroc	mcc
0	829	843	0	0	100	0	100	49.5813	0.992719	0	0	207	211	0	0	100	0	100	49.5215	0.992845	0
0.1	824	204	639	5	99.3969	75.8007	24.1993	87.5	0.992719	0.772601	0.1	205	52	159	2	99.0338	75.3555	24.6445	87.0813	0.992845	0.764288
0.2	815	93	750	14	98.3112	88.968	11.032	93.6005	0.992719	0.876016	0.2	203	25	186	4	98.0676	88.1517	11.8483	93.0622	0.992845	0.865738
0.3	806	46	797	23	97.2256	94.5433	5.4567	95.8732	0.992719	0.917825	0.3	202	9	202	5	97.5845	95.7346	4.2654	96.6507	0.992845	0.933191
0.4	798	26	817	31	96.2606	96.9158	3.08422	96.5909	0.992719	0.931827	0.4	201	7	204	6	97.1014	96.6825	3.31754	96.89	0.992845	0.937807
0.5	787	13	830	42	94.9337	98.4579	1.54211	96.7105	0.992719	0.93475	0.5	199	5	206	8	96.1353	97.6303	2.36967	96.89	0.992845	0.937881
0.6	774	7	836	55	93.3655	99.1696	0.830368	96.2919	0.992719	0.927328	0.6	195	2	209	12	94.2029	99.0521	0.947867	96.6507	0.992845	0.934048
0.7	770	5	838	59	92.883	99.4069	0.59312	96.1722	0.992719	0.925333	0.7	189	1	210	18	91.3043	99.5261	0.473934	95.4545	0.992845	0.912039
0.8	758	5	838	71	91.4355	99.4069	0.59312	95.4545	0.992719	0.911875	0.8	188	1	210	19	90.8213	99.5261	0.473934	95.2153	0.992845	0.907597
0.9	715	1	842	114	86.2485	99.8814	0.118624	93.122	0.992719	0.870281	0.9	182	0	211	25	87.9227	100	0	94.0191	0.992845	0.886616
TOP 30
ETREES											ETREES
Threshold	TP	FP	TN	FN	sens	spec	FPR	acc	auroc	mcc	Threshold	TP	FP	TN	FN	sens	spec	FPR	acc	auroc	mcc
0	829	843	0	0	100	0	100	49.5813	0.992404	0	0	207	211	0	0	100	0	100	49.5215	0.990166	0
0.1	824	268	575	5	99.3969	68.2088	31.7912	83.6722	0.992404	0.710148	0.1	203	70	141	4	98.0676	66.8246	33.1754	82.2967	0.990166	0.681638
0.2	821	108	735	8	99.035	87.1886	12.8114	93.0622	0.992404	0.867591	0.2	203	25	186	4	98.0676	88.1517	11.8483	93.0622	0.990166	0.865738
0.3	806	44	799	23	97.2256	94.7805	5.21945	95.9928	0.992404	0.920158	0.3	201	11	200	6	97.1014	94.7867	5.21327	95.933	0.990166	0.918934
0.4	800	29	814	29	96.5018	96.5599	3.44009	96.5311	0.992404	0.930617	0.4	199	5	206	8	96.1353	97.6303	2.36967	96.89	0.990166	0.937881
0.5	787	13	830	42	94.9337	98.4579	1.54211	96.7105	0.992404	0.93475	0.5	199	3	208	8	96.1353	98.5782	1.4218	97.3684	0.990166	0.947623
0.6	777	8	835	52	93.7274	99.051	0.948992	96.4115	0.992404	0.929483	0.6	196	2	209	11	94.686	99.0521	0.947867	96.89	0.990166	0.938639
0.7	766	4	839	63	92.4005	99.5255	0.474496	95.9928	0.992404	0.922106	0.7	192	1	210	15	92.7536	99.5261	0.473934	96.1722	0.990166	0.925471
0.8	750	3	840	79	90.4704	99.6441	0.355872	95.0957	0.992404	0.905588	0.8	187	0	211	20	90.3382	100	0	95.2153	0.990166	0.908387
0.9	682	2	841	147	82.2678	99.7628	0.237248	91.0885	0.992404	0.834181	0.9	169	0	211	38	81.6425	100	0	90.9091	0.990166	0.831763
TOP 40
svc											svc
Threshold	TP	FP	TN	FN	sens	spec	FPR	acc	auroc	mcc	Threshold	TP	FP	TN	FN	sens	spec	FPR	acc	auroc	mcc
0	829	843	0	0	100	0	100	49.5813	0.989661	0	0	207	211	0	0	100	0	100	49.5215	0.989812	0
0.1	816	103	740	13	98.4318	87.7817	12.2183	93.0622	0.989661	0.866386	0.1	203	30	181	4	98.0676	85.782	14.218	91.866	0.989812	0.844041
0.2	809	61	782	20	97.5875	92.7639	7.23606	95.1555	0.989661	0.90423	0.2	202	13	198	5	97.5845	93.8389	6.16114	95.6938	0.989812	0.914569
0.3	805	46	797	24	97.1049	94.5433	5.4567	95.8134	0.989661	0.916598	0.3	202	8	203	5	97.5845	96.2085	3.79147	96.89	0.989812	0.937899
0.4	799	30	813	30	96.3812	96.4413	3.55872	96.4115	0.989661	0.928225	0.4	202	5	206	5	97.5845	97.6303	2.36967	97.6077	0.989812	0.952149
0.5	791	22	821	38	95.4162	97.3903	2.60973	96.4115	0.989661	0.928383	0.5	201	5	206	6	97.1014	97.6303	2.36967	97.3684	0.989812	0.947372
0.6	788	18	825	41	95.0543	97.8648	2.13523	96.4713	0.989661	0.929757	0.6	200	2	209	7	96.6184	99.0521	0.947867	97.8469	0.989812	0.957198
0.7	780	18	825	49	94.0893	97.8648	2.13523	95.9928	0.989661	0.920459	0.7	200	2	209	7	96.6184	99.0521	0.947867	97.8469	0.989812	0.957198
0.8	767	13	830	62	92.5211	98.4579	1.54211	95.5144	0.989661	0.911806	0.8	196	2	209	11	94.686	99.0521	0.947867	96.89	0.989812	0.938639
0.9	743	8	835	86	89.6261	99.051	0.948992	94.378	0.989661	0.891359	0.9	190	0	211	17	91.7874	100	0	95.933	0.989812	0.921649
TOP 50
svc											svc
Threshold	TP	FP	TN	FN	sens	spec	FPR	acc	auroc	mcc	Threshold	TP	FP	TN	FN	sens	spec	FPR	acc	auroc	mcc
0	829	843	0	0	100	0	100	49.5813	0.990985	0	0	207	211	0	0	100	0	100	49.5215	0.989308	0
0.1	817	94	749	12	98.5525	88.8493	11.1507	93.6603	0.990985	0.877526	0.1	202	19	192	5	97.5845	90.9953	9.00474	94.2584	0.989308	0.887221
0.2	812	52	791	17	97.9493	93.8316	6.16845	95.8732	0.990985	0.918292	0.2	202	10	201	5	97.5845	95.2607	4.73934	96.4115	0.989308	0.928505
0.3	806	37	806	23	97.2256	95.6109	4.38909	96.4115	0.990985	0.928365	0.3	202	7	204	5	97.5845	96.6825	3.31754	97.1292	0.989308	0.942627
0.4	801	29	814	28	96.6224	96.5599	3.44009	96.5909	0.990985	0.931815	0.4	202	5	206	5	97.5845	97.6303	2.36967	97.6077	0.989308	0.952149
0.5	795	23	820	34	95.8987	97.2716	2.72835	96.5909	0.990985	0.931887	0.5	201	3	208	6	97.1014	98.5782	1.4218	97.8469	0.989308	0.957027
0.6	789	17	826	40	95.1749	97.9834	2.01661	96.5909	0.990985	0.932151	0.6	201	2	209	6	97.1014	99.0521	0.947867	98.0861	0.989308	0.961888
0.7	786	16	827	43	94.813	98.102	1.89798	96.4713	0.990985	0.929887	0.7	201	2	209	6	97.1014	99.0521	0.947867	98.0861	0.989308	0.961888
0.8	776	10	833	53	93.6068	98.8138	1.18624	96.2321	0.990985	0.92583	0.8	201	2	209	6	97.1014	99.0521	0.947867	98.0861	0.989308	0.961888
0.9	754	7	836	75	90.953	99.1696	0.830368	95.0957	0.990985	0.904843	0.9	196	0	211	11	94.686	100	0	97.3684	0.989308	0.948653
TOP 60
svc											svc
Threshold	TP	FP	TN	FN	sens	spec	FPR	acc	auroc	mcc	Threshold	TP	FP	TN	FN	sens	spec	FPR	acc	auroc	mcc
0	829	843	0	0	100	0	100	49.5813	0.99146	0	0	207	211	0	0	100	0	100	49.5215	0.988621	0
0.1	818	100	743	11	98.6731	88.1376	11.8624	93.3612	0.99146	0.872283	0.1	202	22	189	5	97.5845	89.5735	10.4265	93.5407	0.988621	0.873793
0.2	812	51	792	17	97.9493	93.9502	6.04982	95.933	0.99146	0.919443	0.2	202	10	201	5	97.5845	95.2607	4.73934	96.4115	0.988621	0.928505
0.3	808	31	812	21	97.4668	96.3227	3.67734	96.89	0.99146	0.937868	0.3	202	7	204	5	97.5845	96.6825	3.31754	97.1292	0.988621	0.942627
0.4	805	24	819	24	97.1049	97.153	2.84698	97.1292	0.99146	0.94258	0.4	202	5	206	5	97.5845	97.6303	2.36967	97.6077	0.988621	0.952149
0.5	798	17	826	31	96.2606	97.9834	2.01661	97.1292	0.99146	0.942704	0.5	201	3	208	6	97.1014	98.5782	1.4218	97.8469	0.988621	0.957027
0.6	789	15	828	40	95.1749	98.2206	1.77936	96.7105	0.99146	0.934608	0.6	201	2	209	6	97.1014	99.0521	0.947867	98.0861	0.988621	0.961888
0.7	784	14	829	45	94.5718	98.3393	1.66074	96.4713	0.99146	0.930039	0.7	201	2	209	6	97.1014	99.0521	0.947867	98.0861	0.988621	0.961888
0.8	771	10	833	58	93.0036	98.8138	1.18624	95.933	0.99146	0.920135	0.8	199	2	209	8	96.1353	99.0521	0.947867	97.6077	0.988621	0.952528
0.9	759	5	838	70	91.5561	99.4069	0.59312	95.5144	0.99146	0.91299	0.9	195	0	211	12	94.2029	100	0	97.1292	0.988621	0.944106
TOP 68
svc											svc
Threshold	TP	FP	TN	FN	sens	spec	FPR	acc	auroc	mcc	Threshold	TP	FP	TN	FN	sens	spec	FPR	acc	auroc	mcc
0	829	843	0	0	100	0	100	49.5813	0.991699	0	0	207	211	0	0	100	0	100	49.5215	0.989514	0
0.1	816	90	753	13	98.4318	89.3238	10.6762	93.8397	0.991699	0.880619	0.1	202	15	196	5	97.5845	92.891	7.109	95.2153	0.989514	0.905377
0.2	811	51	792	18	97.8287	93.9502	6.04982	95.8732	0.991699	0.918201	0.2	202	11	200	5	97.5845	94.7867	5.21327	96.1722	0.989514	0.92384
0.3	808	39	804	21	97.4668	95.3737	4.62633	96.4115	0.991699	0.928453	0.3	202	10	201	5	97.5845	95.2607	4.73934	96.4115	0.989514	0.928505
0.4	801	28	815	28	96.6224	96.6785	3.32147	96.6507	0.991699	0.93301	0.4	202	6	205	5	97.5845	97.1564	2.8436	97.3684	0.989514	0.947377
0.5	798	21	822	31	96.2606	97.5089	2.4911	96.89	0.991699	0.937856	0.5	201	5	206	6	97.1014	97.6303	2.36967	97.3684	0.989514	0.947372
0.6	792	15	828	37	95.5368	98.2206	1.77936	96.89	0.991699	0.938106	0.6	201	3	208	6	97.1014	98.5782	1.4218	97.8469	0.989514	0.957027
0.7	788	13	830	41	95.0543	98.4579	1.54211	96.7703	0.991699	0.93591	0.7	201	2	209	6	97.1014	99.0521	0.947867	98.0861	0.989514	0.961888
0.8	776	11	832	53	93.6068	98.6951	1.30486	96.1722	0.991699	0.924576	0.8	198	1	210	9	95.6522	99.5261	0.473934	97.6077	0.989514	0.95283
0.9	761	7	836	68	91.7973	99.1696	0.830368	95.5144	0.991699	0.912662	0.9	193	0	211	14	93.2367	100	0	96.6507	0.989514	0.935069
